# Supplementary material for: Biological and Chemical Insights of Beech (Fagus sylvatica L.) Bark: A Source of Bioactive Compounds with Functional Properties
Source: PubMed Central journal article supplement (PMC6769934; doi:10.3390/antiox8090417), 2019-09-19
Supplement: antioxidants-08-00417-s001.pdf [file antioxidants-08-00417-s001.pdf]

## Supplementary Material

**Table S1 - ANOVA – complete summary of the regression and residual analysis**

| <b>BBE1</b>     |           |           |                      |          |              |           |
|-----------------|-----------|-----------|----------------------|----------|--------------|-----------|
|                 | <b>DF</b> | <b>SS</b> | <b>MS (variance)</b> | <b>F</b> | <b>p</b>     | <b>SD</b> |
| Total           | 13        | 44,248.1  | 3403.7               |          |              |           |
| Constant        | 1         | 43,633.4  | 43633.4              |          |              |           |
| Total corrected | 12        | 614.64    | 51.22                |          |              | 7.15682   |
| Regression      | 5         | 614.233   | 122.847              | 2112.44  | <b>0.000</b> | 11.0836   |
| Residual        | 7         | 0.407077  | 0.0581539            |          |              | 0.241151  |
| Lack of Fit     | 2         | 0.032481  | 0.0162404            | 0.216771 | <b>0.812</b> | 0.127438  |
| <b>BBE2</b>     |           |           |                      |          |              |           |
|                 | <b>DF</b> | <b>SS</b> | <b>MS (variance)</b> | <b>F</b> | <b>p</b>     | <b>SD</b> |
| Total           | 12        | 62,084.4  | 5173.7               |          |              |           |
| Constant        | 1         | 62,006.6  | 62006.6              |          |              |           |
| Total corrected | 11        | 77.8445   | 7.07677              |          |              | 2.66022   |
| Regression      | 5         | 77.5041   | 15.5008              | 273.225  | <b>0.000</b> | 3.93711   |
| Residual        | 6         | 0.340397  | 0.0567328            |          |              | 0.238186  |
| Lack of Fit     | 1         | 0.153448  | 0.153448             | 4.10399  | <b>0.099</b> | 0.391724  |
| <b>BBE3</b>     |           |           |                      |          |              |           |
|                 | <b>DF</b> | <b>SS</b> | <b>MS (variance)</b> | <b>F</b> | <b>p</b>     | <b>SD</b> |
| Total           | 13        | 57,235.1  | 4402.7               |          |              |           |
| Constant        | 1         | 57,130.7  | 57130.7              |          |              |           |
| Total corrected | 12        | 104.37    | 8.69747              |          |              | 2.94915   |
| Regression      | 5         | 104.105   | 20.821               | 551.094  | <b>0.000</b> | 4.56301   |
| Residual        | 7         | 0.264469  | 0.0377813            |          |              | 0.194374  |
| Lack of Fit     | 2         | 0.076544  | 0.0382718            | 1.01827  | <b>0.426</b> | 0.195632  |

Abbreviations: DF – degrees of freedom, SS – sum of squares, MS – mean square (=SS/DF), F-distribution value, p – probability, SD – standard deviation.
